# Supplementary material
Source: publisher site journal article supplement (https://www.dovepress.com/article/578610)
Supplement: Supplementary file 1 [file 578610%20Revised%20Supplementary%20Figures%201-6.pdf]

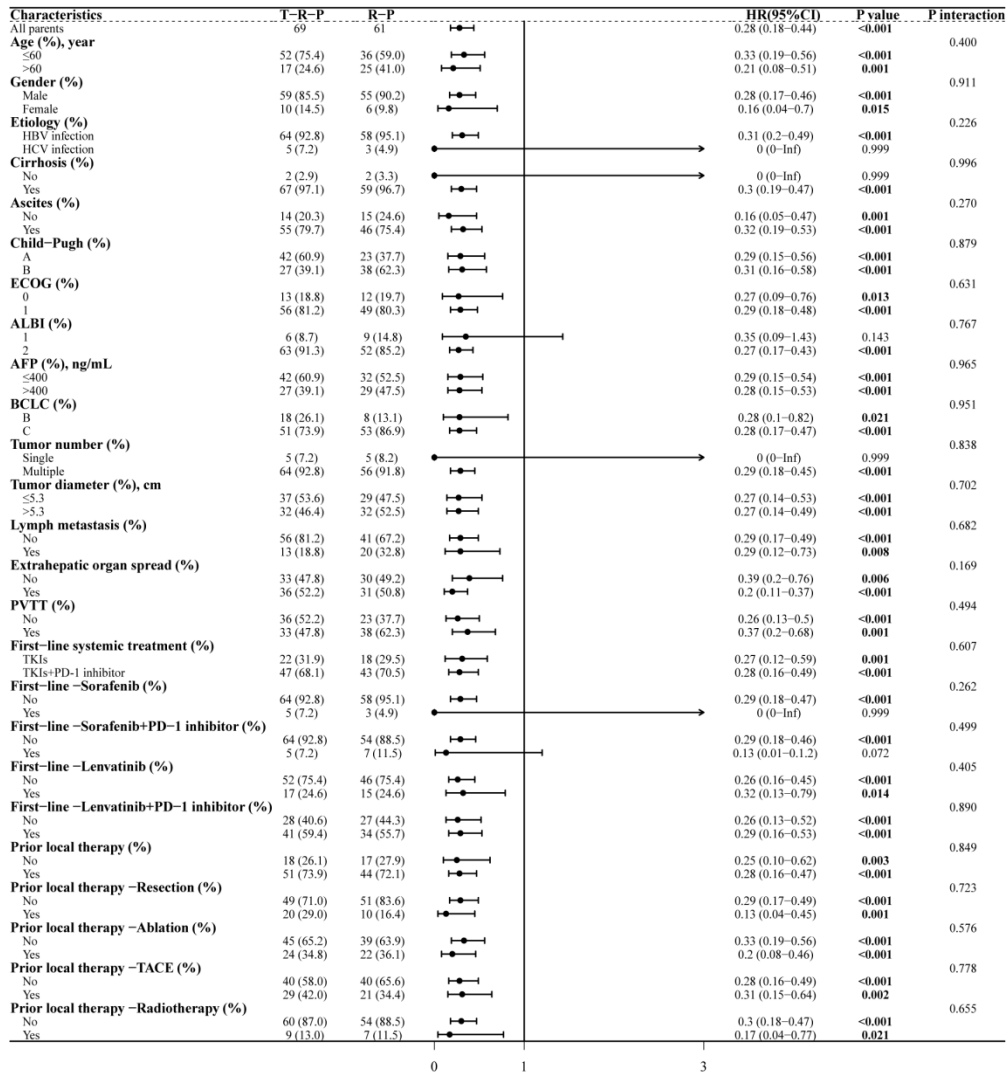

Supplementary Figure 1 Subgroup analysis of overall survival in the unmatched cohort.

Note: The hazard ratio (HR) and 95% confidence interval (CI) for each subgroup are shown. Bold values indicate statistical significance ( $P < 0.05$ ) for the treatment comparison within that subgroup.

Abbreviations: PSM, propensity score matching; R-P, regorafenib plus PD-1 inhibitor; TACE, transarterial chemoembolization; T-R-P, TACE plus regorafenib plus PD-1 inhibitor; CI, confidence interval; HR, hazard ratio; ECOG, Eastern Cooperative Oncology Group; ALBI, albumin-bilirubin; AFP, alpha-fetoprotein; BCLC, Barcelona Clinic Liver Cancer; PVTT, portal vein tumor thrombosis.

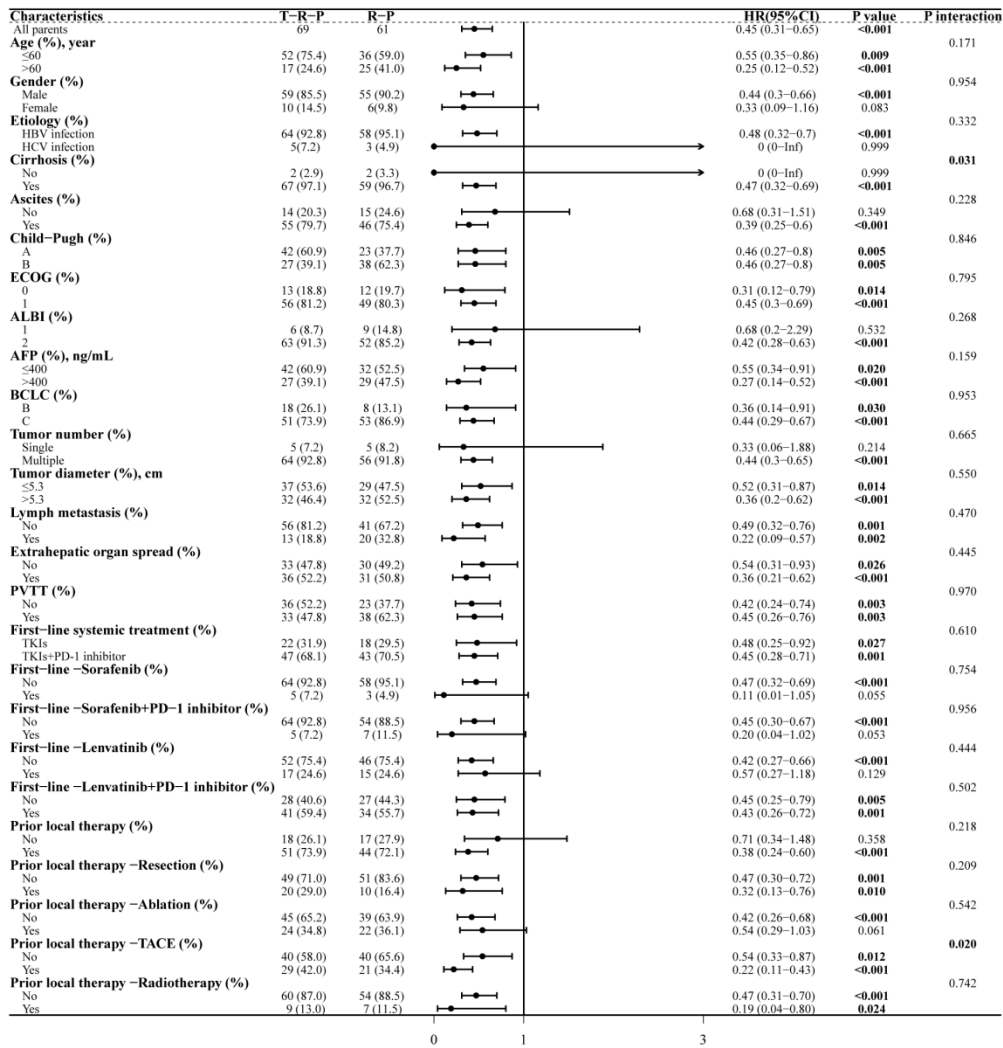

Supplementary Figure 2 Subgroup analysis of progression-free survival in the unmatched cohort.

Note: The hazard ratio (HR) and 95% confidence interval (CI) for each subgroup are shown. Bold values indicate statistical significance ( $P < 0.05$ ) for the treatment comparison within that subgroup.

Abbreviations: PSM, propensity score matching; R-P, regorafenib plus PD-1 inhibitor; TACE, transarterial chemoembolization; T-R-P, TACE plus regorafenib plus PD-1 inhibitor; CI, confidence interval; HR, hazard ratio; ECOG, Eastern Cooperative Oncology Group; ALBI, albumin-bilirubin; AFP, alpha-fetoprotein; BCLC, Barcelona Clinic Liver Cancer; PVTT, portal vein tumor thrombosis.

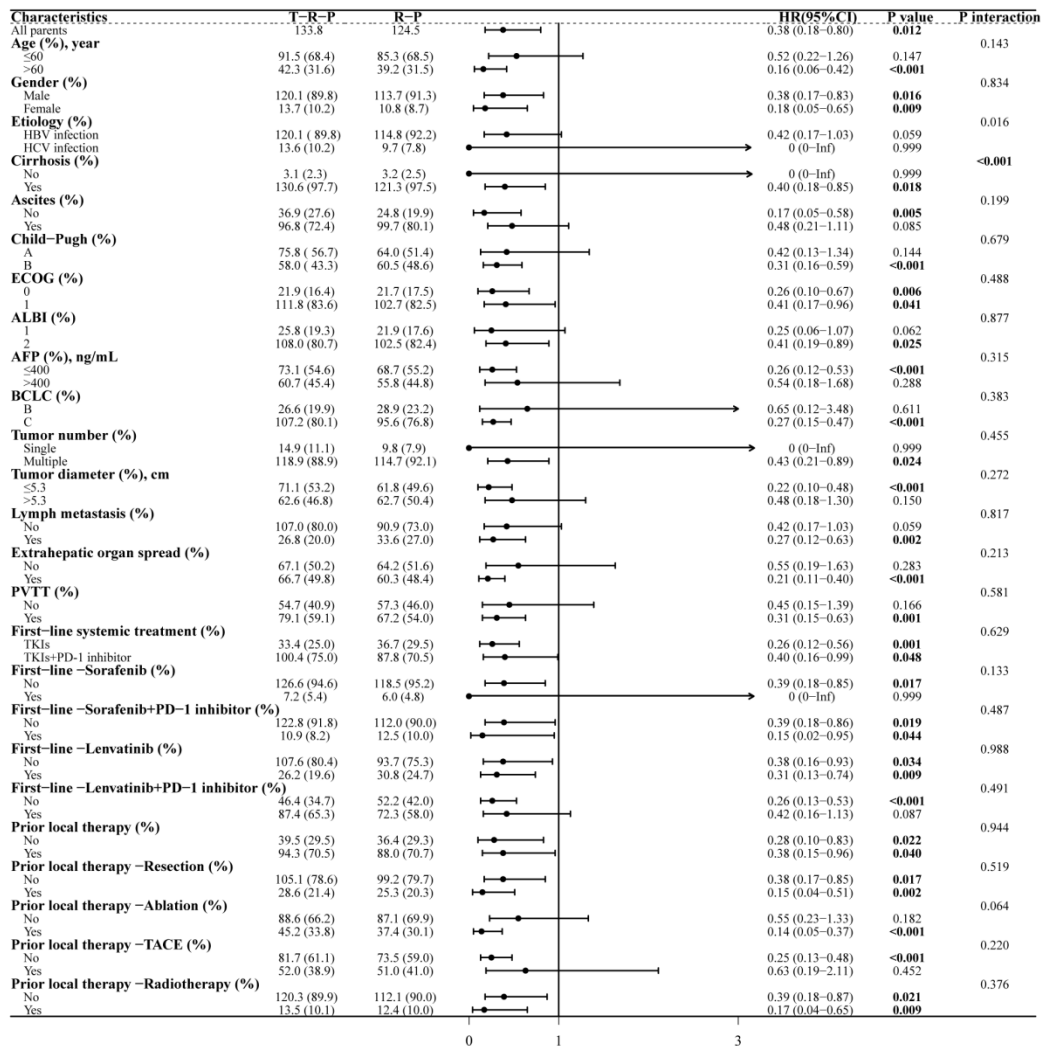

Supplementary Figure 3 Subgroup analysis of overall survival after IPTW.

Note: The hazard ratio (HR) and 95% confidence interval (CI) for each subgroup are shown. Bold values indicate statistical significance ( $P < 0.05$ ) for the treatment comparison within that subgroup.

Abbreviations: PSM, propensity score matching; R-P, regorafenib plus PD-1 inhibitor; TACE, transarterial chemoembolization; T-R-P, TACE plus regorafenib plus PD-1 inhibitor; CI, confidence interval; HR, hazard ratio; ECOG, Eastern Cooperative Oncology Group; ALBI, albumin-bilirubin; AFP, alpha-fetoprotein; BCLC, Barcelona Clinic Liver Cancer; PVTT, portal vein tumor thrombosis.

| Characteristics                       | T-R-P        | R-P          |  | HR(95%CI)        | P value          | P interaction |
|---------------------------------------|--------------|--------------|--|------------------|------------------|---------------|
| All patients                          | 133.8        | 124.5        |  | 0.38 (0.25-0.59) | <b>&lt;0.001</b> |               |
| Age (%), year                         |              |              |  |                  |                  |               |
| ≤60                                   | 91.5 (68.4)  | 85.3 (68.5)  |  | 0.47 (0.29-0.76) | <b>0.002</b>     | 0.345         |
| >60                                   | 42.3 (31.6)  | 39.2 (31.5)  |  | 0.23 (0.09-0.55) | <b>0.001</b>     |               |
| Gender (%)                            |              |              |  |                  |                  |               |
| Male                                  | 120.1 (89.8) | 113.7 (91.3) |  | 0.38 (0.24-0.60) | <b>&lt;0.001</b> | 0.907         |
| Female                                | 13.7 (10.2)  | 10.8 (8.7)   |  | 0.26 (0.08-0.85) | <b>0.026</b>     |               |
| Etiology (%)                          |              |              |  |                  |                  |               |
| HBV infection                         | 120.1 (89.8) | 114.8 (92.2) |  | 0.41 (0.26-0.64) | <b>&lt;0.001</b> | 0.395         |
| HCV infection                         | 13.6 (10.2)  | 9.7 (7.8)    |  | 0 (0-Inf)        | 0.999            |               |
| Cirrhosis (%)                         |              |              |  |                  |                  |               |
| No                                    | 3.1 (2.3)    | 3.2 (2.5)    |  | 0 (0-Inf)        | 0.999            | <b>0.002</b>  |
| Yes                                   | 130.6 (97.7) | 121.3 (97.5) |  | 0.40 (0.26-0.62) | <b>&lt;0.001</b> |               |
| Ascites (%)                           |              |              |  |                  |                  |               |
| No                                    | 36.9 (27.6)  | 24.8 (19.9)  |  | 0.65 (0.30-1.39) | 0.266            | 0.084         |
| Yes                                   | 96.8 (72.4)  | 99.7 (80.1)  |  | 0.32 (0.18-0.57) | <b>&lt;0.001</b> |               |
| Child-Pugh (%)                        |              |              |  |                  |                  |               |
| A                                     | 75.8 (56.7)  | 64.0 (51.4)  |  | 0.34 (0.19-0.59) | <b>&lt;0.001</b> | 0.708         |
| B                                     | 58.0 (43.3)  | 60.5 (48.6)  |  | 0.44 (0.23-0.81) | <b>0.009</b>     |               |
| ECOG (%)                              |              |              |  |                  |                  |               |
| 0                                     | 21.9 (16.4)  | 21.7 (17.5)  |  | 0.28 (0.10-0.74) | <b>0.010</b>     | 0.771         |
| 1                                     | 111.8 (83.6) | 102.7 (82.5) |  | 0.39 (0.24-0.62) | <b>&lt;0.001</b> |               |
| ALBI (%)                              |              |              |  |                  |                  |               |
| 1                                     | 25.8 (19.3)  | 21.9 (17.6)  |  | 0.44 (0.17-1.17) | 0.099            | 0.373         |
| 2                                     | 108.0 (80.7) | 102.5 (82.4) |  | 0.37 (0.23-0.60) | <b>&lt;0.001</b> |               |
| AFP (%), ng/mL                        |              |              |  |                  |                  |               |
| ≤400                                  | 73.1 (54.6)  | 68.7 (55.2)  |  | 0.46 (0.26-0.80) | <b>0.006</b>     | 0.219         |
| >400                                  | 60.7 (45.4)  | 55.8 (44.8)  |  | 0.21 (0.11-0.42) | <b>&lt;0.001</b> |               |
| BCLC (%)                              |              |              |  |                  |                  |               |
| B                                     | 26.6 (19.9)  | 28.9 (23.2)  |  | 0.27 (0.12-0.61) | <b>0.002</b>     | 0.513         |
| C                                     | 107.2 (80.1) | 95.6 (76.8)  |  | 0.41 (0.25-0.66) | <b>&lt;0.001</b> |               |
| Tumor number (%)                      |              |              |  |                  |                  |               |
| Single                                | 14.9 (11.1)  | 9.8 (7.9)    |  | 0.12 (0.01-0.97) | <b>0.047</b>     | 0.508         |
| Multiple                              | 118.9 (88.9) | 114.7 (92.1) |  | 0.38 (0.25-0.60) | <b>&lt;0.001</b> |               |
| Tumor diameter (%), cm                |              |              |  |                  |                  |               |
| ≤5.3                                  | 71.1 (53.2)  | 61.8 (49.6)  |  | 0.40 (0.21-0.78) | <b>0.007</b>     | 0.927         |
| >5.3                                  | 62.6 (46.8)  | 62.7 (50.4)  |  | 0.34 (0.19-0.60) | <b>&lt;0.001</b> |               |
| Lymph metastasis (%)                  |              |              |  |                  |                  |               |
| No                                    | 107.0 (80.0) | 90.9 (73.0)  |  | 0.43 (0.26-0.70) | <b>0.001</b>     | 0.259         |
| Yes                                   | 26.8 (20.0)  | 33.6 (27.0)  |  | 0.18 (0.07-0.47) | <b>&lt;0.001</b> |               |
| Extrahepatic organ spread             |              |              |  |                  |                  |               |
| No                                    | 67.1 (50.2)  | 64.2 (51.6)  |  | 0.42 (0.22-0.78) | <b>0.007</b>     | 0.665         |
| Yes                                   | 66.7 (49.8)  | 60.3 (48.4)  |  | 0.33 (0.19-0.59) | <b>&lt;0.001</b> |               |
| PVTT (%)                              |              |              |  |                  |                  |               |
| No                                    | 54.7 (40.9)  | 57.3 (46.0)  |  | 0.33 (0.17-0.64) | <b>0.001</b>     | 0.365         |
| Yes                                   | 79.1 (59.1)  | 67.2 (54.0)  |  | 0.44 (0.25-0.77) | <b>0.004</b>     |               |
| First-line systemic treatment (%)     |              |              |  |                  |                  |               |
| TKIs                                  | 33.4 (25.0)  | 36.7 (29.5)  |  | 0.39 (0.19-0.81) | <b>0.011</b>     | 0.973         |
| TKIs+PD-1 inhibitor                   | 100.4 (75.0) | 87.8 (70.5)  |  | 0.39 (0.23-0.67) | <b>0.001</b>     |               |
| First-line -Sorafenib                 |              |              |  |                  |                  |               |
| No                                    | 126.6 (94.6) | 118.5 (95.2) |  | 0.39 (0.25-0.61) | <b>&lt;0.001</b> | 0.768         |
| Yes                                   | 7.2 (5.4)    | 6.0 (4.8)    |  | 0.12 (0.02-0.83) | <b>0.031</b>     |               |
| First-line -Sorafenib+PD-1 inhibitor  |              |              |  |                  |                  |               |
| No                                    | 122.8 (91.8) | 112.0 (90.0) |  | 0.39 (0.25-0.61) | <b>&lt;0.001</b> | 0.961         |
| Yes                                   | 10.9 (8.2)   | 12.5 (10.0)  |  | 0.11 (0.02-0.51) | <b>0.005</b>     |               |
| First-line -Lenvatinib                |              |              |  |                  |                  |               |
| No                                    | 107.6 (80.4) | 93.7 (75.3)  |  | 0.38 (0.23-0.64) | <b>&lt;0.001</b> | 0.864         |
| Yes                                   | 26.2 (19.6)  | 30.8 (24.7)  |  | 0.45 (0.21-0.97) | <b>0.041</b>     |               |
| First-line -Lenvatinib+PD-1 inhibitor |              |              |  |                  |                  |               |
| No                                    | 46.4 (34.7)  | 52.2 (42.0)  |  | 0.36 (0.19-0.70) | <b>0.003</b>     | 0.785         |
| Yes                                   | 87.4 (65.3)  | 72.3 (58.0)  |  | 0.38 (0.21-0.67) | <b>0.001</b>     |               |
| Prior local therapy (%)               |              |              |  |                  |                  |               |
| No                                    | 39.5 (29.5)  | 36.4 (29.3)  |  | 0.61 (0.28-1.30) | 0.201            | 0.267         |
| Yes                                   | 94.3 (70.5)  | 88.0 (70.7)  |  | 0.30 (0.18-0.52) | <b>&lt;0.001</b> |               |
| Prior local therapy -Resection        |              |              |  |                  |                  |               |
| No                                    | 105.1 (78.6) | 99.2 (79.7)  |  | 0.40 (0.25-0.66) | <b>&lt;0.001</b> | 0.229         |
| Yes                                   | 28.6 (21.4)  | 25.3 (20.3)  |  | 0.29 (0.13-0.64) | <b>0.002</b>     |               |
| Prior local therapy -Ablation         |              |              |  |                  |                  |               |
| No                                    | 88.6 (66.2)  | 87.1 (69.9)  |  | 0.37 (0.21-0.66) | <b>0.001</b>     | 0.570         |
| Yes                                   | 45.2 (33.8)  | 37.4 (30.1)  |  | 0.43 (0.21-0.89) | <b>0.023</b>     |               |
| Prior local therapy -TACE             |              |              |  |                  |                  |               |
| No                                    | 81.7 (61.1)  | 73.5 (59.0)  |  | 0.52 (0.31-0.87) | <b>0.013</b>     | <b>0.008</b>  |
| Yes                                   | 52.0 (38.9)  | 51.0 (41.0)  |  | 0.16 (0.08-0.32) | <b>&lt;0.001</b> |               |
| Prior local therapy -Radiotherapy     |              |              |  |                  |                  |               |
| No                                    | 120.3 (89.9) | 112.1 (90.0) |  | 0.39 (0.25-0.61) | <b>&lt;0.001</b> | 0.999         |
| Yes                                   | 13.5 (10.1)  | 12.4 (10.0)  |  | 0.15 (0.04-0.63) | <b>0.009</b>     |               |

Supplementary Figure 4 Subgroup analysis of progression-free survival after IPTW.

Note: The hazard ratio (HR) and 95% confidence interval (CI) for each subgroup are shown. Bold values indicate statistical significance ( $P < 0.05$ ) for the treatment comparison within that subgroup.

Abbreviations: PSM, propensity score matching; R-P, regorafenib plus PD-1 inhibitor; TACE, transarterial chemoembolization; T-R-P, TACE plus regorafenib plus PD-1 inhibitor; CI, confidence interval; HR, hazard ratio; ECOG, Eastern Cooperative Oncology Group; ALBI, albumin-bilirubin; AFP, alpha-fetoprotein; BCLC, Barcelona Clinic Liver Cancer; PVTT, portal vein tumor thrombosis.

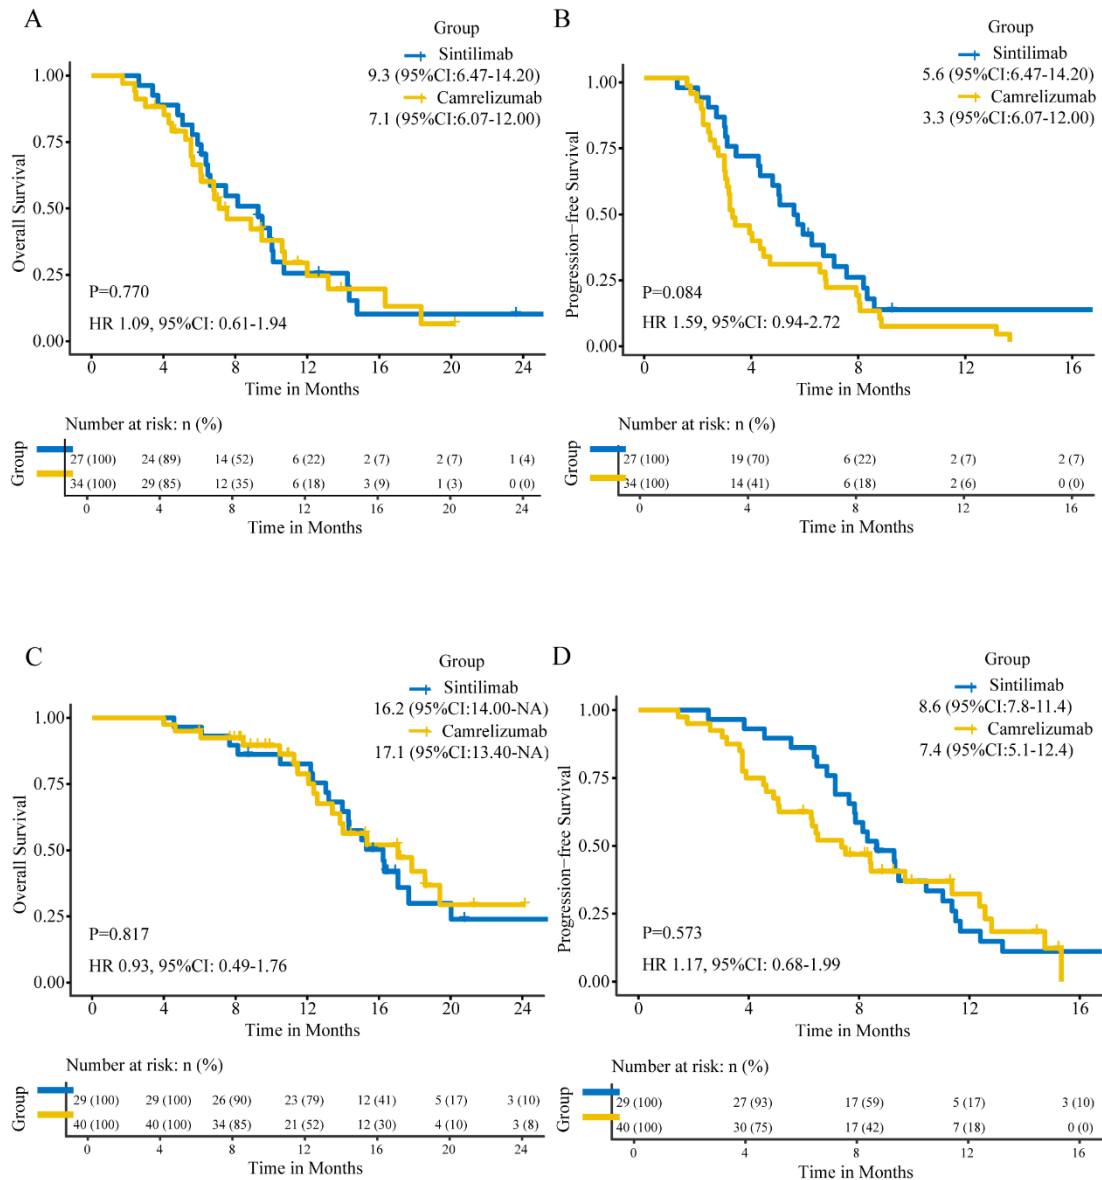

Supplementary Figure 5 Overall survival and progression-free survival according to PD-1 inhibitor type in different treatment groups.

(A) Overall survival in the R-P group comparing sintilimab versus camrelizumab.

(B) Progression-free survival in the R-P group comparing sintilimab versus camrelizumab.

(C) Overall survival in the T-R-P group comparing sintilimab versus camrelizumab.

(D) Progression-free survival in the T-R-P group comparing sintilimab versus camrelizumab.

Abbreviations: R-P, regorafenib plus PD-1 inhibitor; TACE, transarterial chemoembolization;

T-R-P, TACE plus regorafenib plus PD-1 inhibitor; HR, hazard ratio; CI, confidence interval.

A

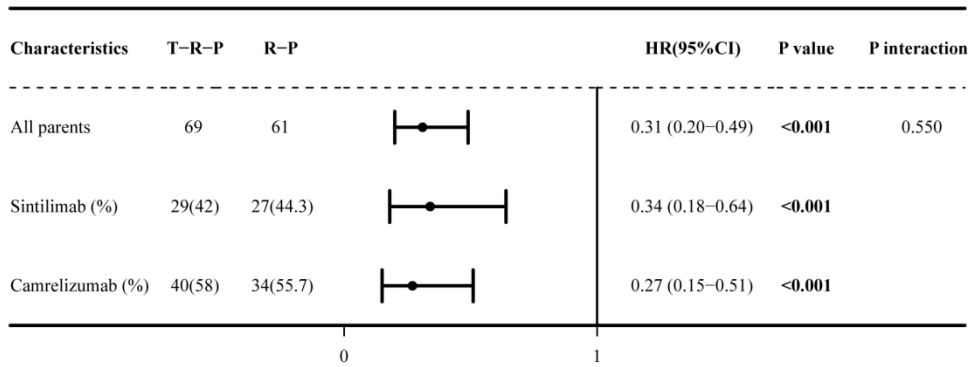

B

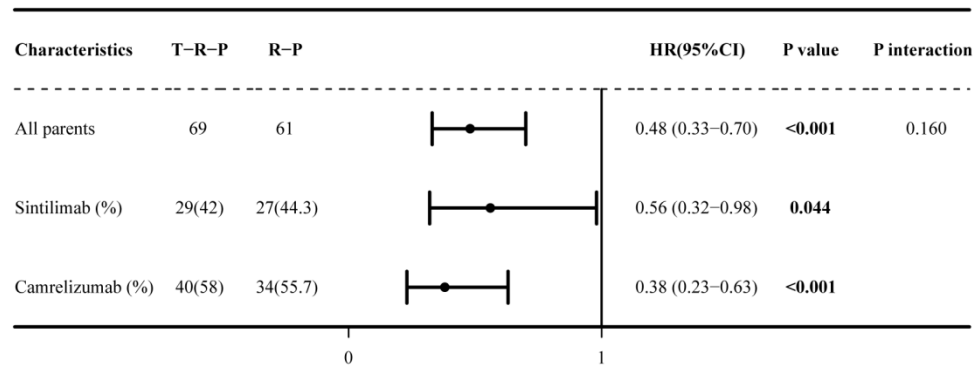

Supplementary Figure 6 Forest plots for subgroup analysis comparing T-R-P versus R-P stratified by PD-1 inhibitor type.

(A) Forest plot for overall survival. (B) Forest plot for progression-free survival.

Note: The hazard ratio (HR) and 95% confidence interval (CI) for each subgroup are shown. Bold values indicate statistical significance ( $P < 0.05$ ) for the treatment comparison within that subgroup.

Abbreviations: CI, confidence interval; HR, hazard ratio; R-P, regorafenib plus PD-1 inhibitor; TACE, transarterial chemoembolization; T-R-P, TACE plus regorafenib plus PD-1 inhibitor.
